# Supplementary material for: Minimal Hepatic Encephalopathy Affects Daily Life of Cirrhotic Patients: A Viewpoint on Clinical Consequences and Therapeutic Opportunities
Source: MDPI journal article supplement (doi:10.3390/jcm11237246), 2022-12-06
Supplement: s1 [file s1]

**Supplementary Table S1:** diagnostic tests for MHE [2].

| Test          | Tested domain                                                                                                  | Copyright | Dedicated (Europe-Asia/USA) | Time required for administration and interpretation (min) | Comments                                                                                |
|---------------|----------------------------------------------------------------------------------------------------------------|-----------|-----------------------------|-----------------------------------------------------------|-----------------------------------------------------------------------------------------|
| <i>NCT-A</i>  | Psychomotor speed                                                                                              | Yes       | No/No                       | 1-2                                                       | Poor specificity                                                                        |
| <i>NCT-B</i>  | Psychomotor speed, set shifting, divided attention                                                             | Yes       | No/No                       | 1-3                                                       | Poor specificity                                                                        |
| <i>BDT</i>    | Visuospatial reasoning, praxis, psychomotor speed                                                              | Yes       | No/Yes                      | 10-20                                                     | It can be used for dementia testing as well                                             |
| <i>DST</i>    | Psychomotor speed, attention                                                                                   | Yes       | No/Yes                      | 4                                                         | Tends to be very sensitive and is an early indicator                                    |
| <i>LTT</i>    | Psychomotor speed, visuomotor ability                                                                          | Yes       | No/Yes                      | 2-4                                                       | Outcomes are errors and time; tests a balance between speed and accuracy                |
| <i>SDT</i>    | Psychomotor speed                                                                                              | Yes       | No/es                       | 1-2                                                       | Only tests psychomotor speed but has a higher sensitivity than DST                      |
| <i>PHES</i>   | Psychomotor speed, set shifting, attention, visual perception and visuospatial orientation, visuomotor ability | Yes       | No/Not for all tests        | 15                                                        | Easy to administer, good external validity; performance influenced by age and education |
| <i>R-BANS</i> | Verbal/visual/working memory, visuospatial, language, and psychomotor speed                                    | Yes       | No/Yes                      | 35                                                        | Has been primarily studied in dementia and brain injury. Limited HE experience          |

|                                             |                                                                                    |     |         |          |                                                                                                                                                      |
|---------------------------------------------|------------------------------------------------------------------------------------|-----|---------|----------|------------------------------------------------------------------------------------------------------------------------------------------------------|
| <i>Animal-naming test</i>                   | Semantic fluency test, verbal retrieval and recall                                 | No  | No      | 1        | Easy tool for caregivers for identify mental status alterations, for illiterate patients,                                                            |
| <i>Inhibitory Control Test (ICT)</i>        | Response inhibition, working memory, vigilance, attention                          | Yes | No/No   | 15-20    | Need highly functional patients, familiarity with computers may be needed                                                                            |
| <i>SCAN test</i>                            | Working memory, vigilance, attention                                               | Yes | No/No   | 15-20    | Prognostic value (predictive of survival)                                                                                                            |
| <i>Continuous Reaction Time (CRT)</i>       | Motor reaction speed, sustained attention, inhibitory control                      | NA  | NA      | 10       | Not affected by age, educational level and intelligence; no learning effect; simple software and hardware are required                               |
| <i>Stroop Test</i>                          | Psychomotor speed, cognitive flexibility, functioning of anterior attention system | No  |         | 5        | Highly accessible by web (available in app-form); quick to teach to subjects and simple to score and interpret; sensitive to cognitive change in MHE |
| <i>Critical Flicker Frequency</i>           | Measure of visual temporal resolution                                              | NA  | NA      | May vary | Predictor of mortality; associated with the development of overt HE; requires specialized equipment                                                  |
| <i>EEG</i>                                  | Generalized brain activity                                                         | No  | Yes/Yes | 10-15    | Can be performed in comatose patients                                                                                                                |
| <i>Visual evoked potentials</i>             | Interval between visual stimulus and activity                                      | No  | Yes/Yes | May vary | Highly variable and poor overall results                                                                                                             |
| <i>Brainstem auditory evoked potentials</i> | Response in the cortex after auditory click stimuli                                | No  | Yes/Yes | May vary | Inconsistent response with HE testing/prognostication                                                                                                |

|                                         |                                                                  |    |         |                  |                                                                                                                        |
|-----------------------------------------|------------------------------------------------------------------|----|---------|------------------|------------------------------------------------------------------------------------------------------------------------|
|                                         |                                                                  |    |         |                  |                                                                                                                        |
| <i>P300 cognitive evoked potentials</i> | An infrequent stimulus embedded in irrelevant stimuli is studied | No | Yes/Yes | Different ranges | Correlates with the severity of the hepatic encephalopathy (prolongation of P300 latencies and reduction in amplitude) |
| <i>CFF</i>                              | Visual discrimination and general arousal                        | No | Yes/Yes | 10               | Need highly functional patients                                                                                        |

**Supplementary Table S2:** published studies on treatment of minimal hepatic encephalopathy.

| First Author/<br>Journal             | Year | Study type           | MHE diagnosis                                          | Active treatment(s) | Patients treated | Length of treatment | Objectives                 | Main results                                                                                                       |
|--------------------------------------|------|----------------------|--------------------------------------------------------|---------------------|------------------|---------------------|----------------------------|--------------------------------------------------------------------------------------------------------------------|
| <b>Psychometry/<br/>MHE reversal</b> |      |                      |                                                        |                     |                  |                     |                            |                                                                                                                    |
| Watanabe et al. [70]                 | 1997 | Original, randomized | NCT A, DST, BDT                                        | Lactulose           | 36 (22)          | 8 w                 | Psychometry                | MHE disappeared in 10 (50%) of the 20 treated patients and persisted in 11 (85%) of the untreated 13 patients.     |
| Horsmans et al. [88]                 | 1997 | Original, randomized | NCT, RTT, sinusoid test, psychomotor performance tests | Lactulose           | 14 (7)           | 2 w                 | Psychometry, ammonia level | NCT (71% vs 14%) and RTT (86% vs 60%) significantly improved; ammonia levels significantly decreased (71% vs 14%). |
| Dhiman et al. [71]                   | 2000 | Original, randomized | NCT A, NCT B, FCT A, FCT B, PC, BDT                    | Lactulose           | 18 (10)          | 12 w                | Psychometry                | Psychometric tests significantly improved (80% vs 0%)                                                              |

|                          |      |                             |                                   |                                                                      |                |      |                                                                                         |                                                                                                                                                                                                                                                                               |
|--------------------------|------|-----------------------------|-----------------------------------|----------------------------------------------------------------------|----------------|------|-----------------------------------------------------------------------------------------|-------------------------------------------------------------------------------------------------------------------------------------------------------------------------------------------------------------------------------------------------------------------------------|
| Malaguarnera et al. [89] | 2007 | Randomized control study    | TMT, WAIS-R, BDT, SDMT, MMSE, EEG | Bifidobacterium longum plus fructo-oligosaccharides (FOS) vs placebo | 60 (30)        | 90 d | Psychometry, ammonia level                                                              | Ammonia level, TMT-A and TMT-B times significantly decreased (p=0.000); performance on SDMT (p < 0.05), MMSE (p=0.000) and BDT (p=0.000) significantly improved.                                                                                                              |
| Sharma et al. [82]       | 2008 | Original, randomized        | NCT A, NCT B, FCT A, FCT B        | Lactulose or Probiotic or Lactulose +Probiotic                       | 105 (35/35/35) | 4 w  | Psychometry, P300 ERP, ammonia level                                                    | <p>Psychometric tests significantly improved in more than 50% of patients:</p> <ul style="list-style-type: none"> <li>- Lactulose group: 19/31 (61%)</li> <li>- Probiotic group: 15/29 (52%)</li> <li>- Combination group: 20/30 (67%)</li> </ul>                             |
| Malaguarnera et al. [90] | 2008 | Randomized controlled study | TMT, SDMT, AVL, MMSE              | Acetyl-L-carnitine                                                   | 125 (65)       | 90 d | Psychometry                                                                             | Psychometric tests (TMT A, TMT B, MMSE, SDMT and AVL) significantly improved (p<0.01).                                                                                                                                                                                        |
| Sharma et al. [91]       | 2014 | Randomized control trial    | NCT-A, FGT-A, DST, CFF            | LOLA or Rifaximin or probiotics or placebo                           | 124 (31/31/32) | 8 w  | Psychometry and CFF                                                                     | Psychometric tests and CFF significantly improved after treatment (67.7%, 70.9%, 50% vs 30%, p<0.05).                                                                                                                                                                         |
| Zhang, Y et al [74]      | 2015 | Original                    | NCT A, NCT B, DST                 | Rifaximin                                                            | 26             | 1 w  | Psychometry, ammonia level, SIBO                                                        | Psychometry significantly improved in 58% (15/26). SIBO ameliorated in 76% (13/17) and ammonia level decreased, mostly in those with SIBO.                                                                                                                                    |
| Xia et al. [92]          | 2018 | Randomized control trial    | NCT-A, DST                        | Probiotics                                                           | 67 (30)        | 12 w | Psychometry, intestinal microbiota, ammonia level, intestinal mucosal barrier function. | <p>Psychometric tests significantly improved (NCT-A, DST).</p> <p>Ammonia level significantly decreased (<math>76.4 \pm 37.3</math> vs. <math>152.0 \pm 48.3</math> <math>\mu\text{mol/mL}</math>, p=0.032).</p> <p>The parameter of intestinal barrier (LPS, D-lactate).</p> |
| Quality of life          |      |                             |                                   |                                                                      |                |      |                                                                                         |                                                                                                                                                                                                                                                                               |

|                    |      |                      |                                     |                                 |               |          |                                                         |                                                                                                                                                                                                                                                               |
|--------------------|------|----------------------|-------------------------------------|---------------------------------|---------------|----------|---------------------------------------------------------|---------------------------------------------------------------------------------------------------------------------------------------------------------------------------------------------------------------------------------------------------------------|
| Prasad et al. [8]  | 2007 | Original, randomized | NCT A, NCT B, FCT A, FCT B, PC, BDT | Lactulose                       | 70 (45)       | 12 w     | Psychometry, HRQOL                                      | The mean total SIP score significantly improved among patients in the treated group (10.39 vs 3.77) compared with patients in the untreated group. Improvement in HRQOL was related to the improvement in psychometry.                                        |
| Sidhu et al. [80]  | 2011 | Original, randomized | NCT A, FCT A, DST, BDT, PC          | Rifaximin                       | 94 (49)       | 8 w      | MHE reversal, HRQOL                                     | MHE reversal in 75.5% (37/49) vs 20% (9/45). The mean total SIP score improved significantly in rifaximin group and this correlated with improvement in psychometry.                                                                                          |
| Mittal et al. [81] | 2011 | Original, randomized | NCT A, NCT B, FCT A, FCT B, PC, BDT | Lactulose or Probiotics or LOLA | 160(40/40/40) | 12 w     | Psychometry, ammonia level, HRQOL                       | MHE significantly improved in all three treatment groups compared with no treatment (P = 0.006). The SIP score significantly decreased in treatment groups vs placebo (p<0.001) and this correlated with improvement in psychometry on multivariate analysis. |
| Bajaj et al [93]   | 2014 | Original, randomized | NCT A NCT B, DST, BDT               | Probiotics                      | 30 (14)       | 8 w      | Psychometry, ammonia level, inflammatory markers, HRQOL | No effects on psychometry but reduction in inflammatory markers (endotoxin and TNF-alpha).                                                                                                                                                                    |
| Sidhu et al. [76]  | 2016 | Original, randomized | NCT A, FCT A, DST, BDT, PC          | Lactulose vs. Rifaximin         | 112 (55/57)   | 12 w     | MHE reversal, HRQOL                                     | Recovery from MHE in 69 % (38/55) and 74% (42/55). HRQOL significantly improved in both groups, but with more side effects in the lactulose group.                                                                                                            |
| Luo et al. [73]    |      | Meta-analysis        | Different diagnostic tools          | Lactulose                       | 434           | Variable | Psychometry, ammonia levels, HRQOL, progression to OHE  | Lactulose reduced the mean number of abnormal neuropsychological tests (RR=0.52), ammonium levels and risk of developing OHE (RR=0.17). HRQOL significantly improved.                                                                                         |

|                          |      |                          |                                |                  |         |      |                                                                     |                                                                                                                                                                                                     |
|--------------------------|------|--------------------------|--------------------------------|------------------|---------|------|---------------------------------------------------------------------|-----------------------------------------------------------------------------------------------------------------------------------------------------------------------------------------------------|
| Malaguarnera et al. [94] | 2018 | Randomized control trial | NCT-A, NCT-B, SF-36, BDI, STAI | Resveratrol      | 90 (35) | 90 d | HRQOL, depression, anxiety                                          | BDI ( $p < 0.001$ ) and STAI ( $p < 0.001$ ) significantly decreased in the treatment group. Physical function, body pain, general health and social function significantly improved after therapy. |
| Wang et al. [95]         | 2019 | Randomized control trial | NCT-A, DST                     | Lactulose        | 98 (67) | 60 d | Psychometry, HRQOL, intestinal microbiota                           | MHE reversal was significantly higher in the treatment group ( $RR=0.46$ , $p= .0002$ ) and physical function significantly improved ( $p= 0.0212$ ).                                               |
| Fagan et al [87]         | 2022 | Randomized control trial | Stroop test, PHES, CFF         | Albumin          | 48 (24) | 5 w  | Psychometry, HRQOL                                                  | Albumin treatment determined MHE reversal and amelioration of HRQOL (physical functioning)                                                                                                          |
| <b>Driving ability</b>   |      |                          |                                |                  |         |      |                                                                     |                                                                                                                                                                                                     |
| Bajaj et al. [83]        | 2011 | Original, randomized     | NCT A, NCT B, DST, BDT, ICT    | Rifaximin        | 42 (21) | 8 w  | Psychometry, HRQOL, driving ability, anti-inflammatory interleukins | Psychometry, driving errors, speeding and illegal turns significantly improved after treatment. The SIP score improved in the psychosocial dimension.                                               |
| <b>OHE development</b>   |      |                          |                                |                  |         |      |                                                                     |                                                                                                                                                                                                     |
| Bajaj et al. [86]        | 2008 | Original, randomized     | NCT A, DST, BDT                | Probiotic yogurt | 25 (17) | 8 w  | MHE reversal, OHE development, HRQOL, Ammonia level, cytokines      | MHE recovery in 71% vs 0% ( $p=0.003$ ). OHE developed in 0% vs 25% ( $p=0.1$ ) No difference in HRQOL, ammonia level and cytokines.                                                                |
| <b>Risk of falls</b>     |      |                          |                                |                  |         |      |                                                                     |                                                                                                                                                                                                     |
| Roman et al. [85]        | 2019 | Original, randomized     | PHES                           | Probiotic        | 36 (18) | 12 w | Psychometry, TUG, gait speed, cytokines                             | Psychometry, gait speed and TUG significantly improved after therapy. Pro-inflammatory cytokines significantly                                                                                      |

|                        |      |             |           |           |         |      |                                              |                                                                         |
|------------------------|------|-------------|-----------|-----------|---------|------|----------------------------------------------|-------------------------------------------------------------------------|
|                        |      |             |           |           |         |      |                                              | decreased (C-reactive protein, tumor necrosis factor alpha, claudin-3). |
| <b>Sleep disorders</b> |      |             |           |           |         |      |                                              |                                                                         |
| Singh et al. [42]      | 2017 | Prospective | PHES, CFF | Lactulose | 50 (50) | 12 w | Psychometry, ammonia level, PSG, PSQI, HRQOL | Psychometry and sleep parameters improved after therapy.                |

**MHE**, Minimal Hepatic Encephalopathy; **OHE**, Overt Hepatic Encephalopathy; **HRQOL**, Health Related Quality of Life; **NCT-A**, number connection test-A; **NCT-B** number connection test-B; **BDT**, block design test; **SDT**, serial dotting test; **DST**, digit symbol test; **LTT**, line tracing test; **PHES**, psychometric hepatic encephalopathy score; **ICT**, inhibitory control test; **CFF**, critical flicker frequency; **EEG**, electroencephalogram; **ICT**, Inhibitory Control Test; **BCAA**, Branched Chain Amino Acids; **SIBO**, Small Intestine Bacterial Overgrowth; **CEP**, Cognitive Evoked Potential; **AVL**, verbal learning test; **FCT**, figure connective tes; **RTT**, race track test; **PC**, picture completion; **WAIS-R**, Wechsler Adult Intelligence Scale—Revised; **SDMT** symbol digit modalities test; **BDI**, Back depression Inventory, **STAI**, stay trait anxiety inventory. **PSG**, polysomnography. **PSQI**, Pittsburgh Sleep Quality Index.
